# Supplementary material for: Spatial scale-dependent land–atmospheric methane exchanges in the northern high latitudes from 1993 to 2004
Source: Copernicus journal article supplement (doi:10.5194/bg-11-1693-2014), 2014-04-01

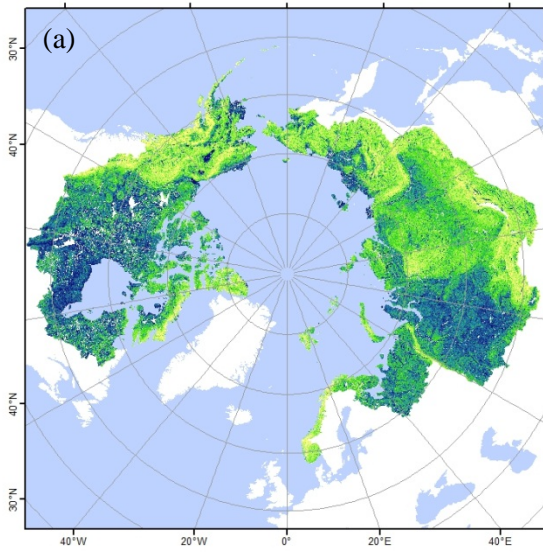

TWI -  $TWI_i$

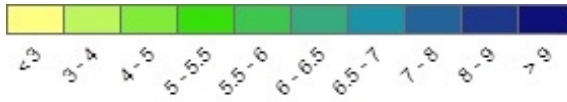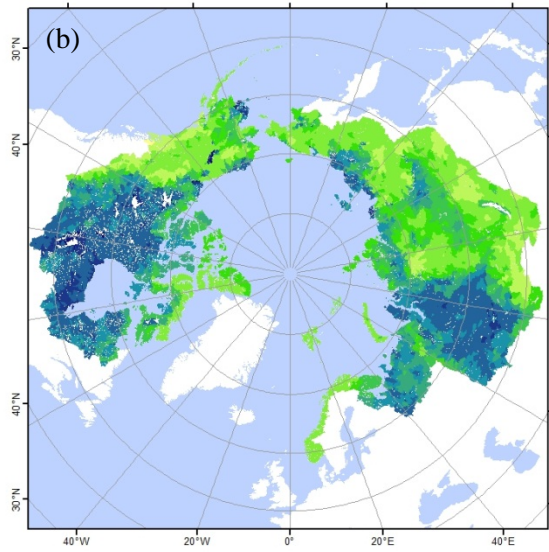

Watershed-mean TWI -  $\overline{TWI}$

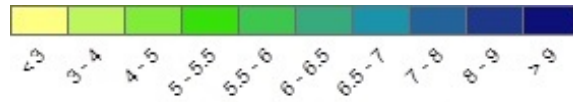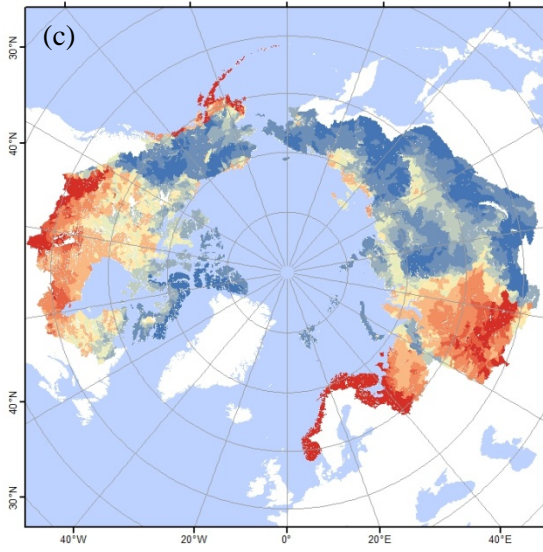

Scaling parameter -  $m$  (m)

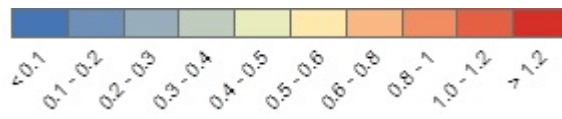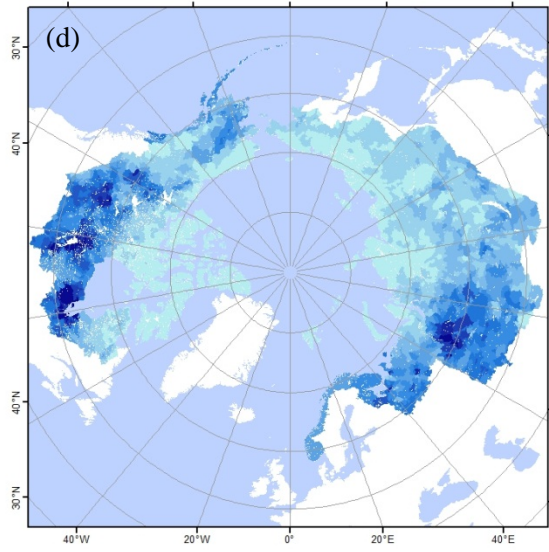

Watershed-mean WTD -  $\overline{Zwt}$  (m)

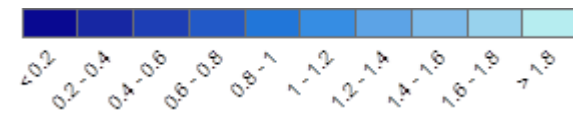

$$Zwt_i = \overline{Zwt} - (TWI_i - \overline{TWI}) \times m$$

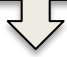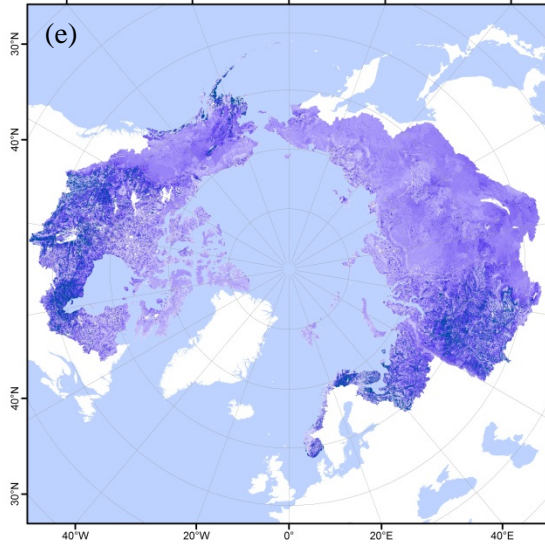

Local WTD -  $Zwt_i$  (m)

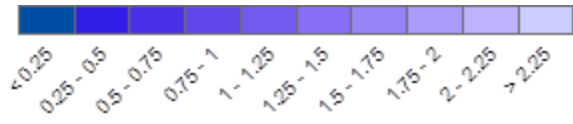

Supplement: Supplementary file 2 [file bg-11-1693-2014-supplement.zip]
