# Supplementary material for: Spatial scale-dependent land–atmospheric methane exchanges in the northern high latitudes from 1993 to 2004
Source: Copernicus journal article supplement (doi:10.5194/bg-11-1693-2014), 2014-04-01
Supplement: Supplementary file 4 [file bg-11-1693-2014-supplement.zip]

**Spatial scale-dependent land-atmospheric methane exchanges in the  
northern high latitudes from 1993 to 2004**

X. Zhu<sup>1</sup>, Q. Zhuang<sup>1,2</sup>, X. Lu<sup>3</sup>, and L. Song<sup>1,4,5</sup>

<sup>1</sup>Department of Earth, Atmospheric, and Planetary Sciences, Purdue University, West  
Lafayette, IN, 47907, USA

<sup>2</sup>Department of Agronomy, Purdue University, West Lafayette, IN 47907, USA

<sup>3</sup>The Ecosystems Center, Marine Biological Laboratory, Woods Hole, MA 02543, USA

<sup>4</sup>Institute of Geographic Sciences and Natural Resources Research, Chinese Academy of  
Sciences, Beijing, 100101, China

<sup>5</sup>Graduate University of the Chinese Academy of Sciences, Beijing, 100049, China

**Corresponding author:** X. Zhu, Department of Earth, Atmospheric, and Planetary  
Sciences, Purdue University, West Lafayette, IN, 47907, USA. Email:  
zhu123@purdue.edu

(Submitted to *Biogeosciences*)

## TOPMODEL parameterization scheme

An illustration of the TOPMODEL-based parameterization scheme was shown in Fig. S3. Watershed-mean topographic wetness index (TWI) (Fig. S3b) was calculated from original TWI data (Fig. S3a) according to basin boundaries from watershed delineation (Fig. S2). Time-varying scaling parameter  $m$  ( $m$  values of July in 1994 were shown in Fig. S3c) was estimated from Eq. (3) and Eq. (4). The topography-related data, including TWI, watershed delineation and terrain slope, was acquired from HYDRO1K database ([http://eros.usgs.gov/#Find\\_Data/Products\\_and\\_Data\\_Available/gtopo30/hydro](http://eros.usgs.gov/#Find_Data/Products_and_Data_Available/gtopo30/hydro)), which provides global coverage of topographically derived data based on 30-sec USGS-GTOPO30 DEM data. The original 1-km TWI data was spatially averaged to get 5-km TWI used in this study. The original five-level watershed delineation basin data was aggregated into four-level data according to Pfafstetter code ([http://eros.usgs.gov/#/Find\\_Data/Products\\_and\\_Data\\_Available/gtopo30/hydro/P311](http://eros.usgs.gov/#/Find_Data/Products_and_Data_Available/gtopo30/hydro/P311)), with average surface area of 6597 km<sup>2</sup> (Fig. S2).

The calibrated time-varying  $\alpha$  in Eq. (3) were shown in Fig. S4a, and the comparison of total inundated area from GIEMS data (Prigent et al., 2007; Papa et al., 2010) and model simulations were shown in Fig. S4b. The calibrated parameter  $\alpha$  had a strong temporal variation: larger in warmer months and smaller in colder months. The monthly parameter  $\alpha$  was spatially constant and larger  $\alpha$  corresponded to larger parameter  $m$ , and resulted in higher variance of local WTD. It is important to note that, in our three-step calibration procedure, only the total inundated area over the whole region, rather than for each grid cell, was confirmed by satellite data. The calibration at each grid cell was impossible since only inundated area fraction data (for the West Siberian

- 41 Lowlands, ~7% of all grid cells were inundated during the growing season (Fig. 5b))  
42 rather than WTD data was available from satellite observations.

## References

- Bellisario, L. M., Bubier, J. L., Moore, T. R., and Chanton, J. P.: Controls on CH<sub>4</sub> emissions from a northern peatland, *Glob. Biogeochem. Cycles*, 13, 81-91, 1999.
- Christensen, T. R.: Methane emission from Arctic tundra, *Biogeochem.*, 21, 117-139, 1993.
- Glagolev, M., Kleptsova, I., Filippov, I., Maksyutov, S., and Machida, T.: Regional methane emission from West Siberia mire landscapes, *Environ. Res. Lett.*, 6, 045214, 2011.
- Heyer, J., Berger, U., Kuzin, I. L., and Yakovlev, O. N.: Methane emissions from different ecosystem structures of the subarctic tundra in Western Siberia during midsummer and during the thawing period, *Tellus B*, 54, 231-249, 2002.
- Moore, T. R., Heyes, A., and Roulet, N. T.: Methane emissions from wetlands, southern Hudson Bay lowland, *J. Geophys. Res.*, 99, 1455-1467, 1994.
- Moosavi, S. C., Crill, P. M., Pullman, E. R., Funk, D. W., and Peterson, K. M.: Controls on CH<sub>4</sub> flux from an Alaskan boreal wetland, *Glob. Biogeochem. Cycles*, 10, 287-296, 1996.
- Nakano, T., Kuniyoshi, S., and Fukuda, M.: Temporal variation in methane emission from tundra wetlands in a permafrost area, northeastern Siberia, *Atmos. Environ.*, 34, 1205-1213, 2000.
- Papa, F., Prigent, C., Aires, F., Jimenez, C., Rossow, W. B., and Matthews, E.: Interannual variability of surface water extent at the global scale, 1993–2004, *J. Geophys. Res.*, 115, D12111, doi: 10.1029/2009JD012674, 2010.

65 Prigent, C., Papa, F., Aires, F., Rossow, W. B., and Matthews, E.: Global inundation  
 66 dynamics inferred from multiple satellite observations, 1993-2000, J. Geophys.  
 67 Res, 112, D12107, doi: 10.1029/2006JD007847, 2007.

68 Rhew, R. C., Teh, Y. A., and Abel, T.: Methyl halide and methane fluxes in the northern  
 69 Alaskan coastal tundra, J. Geophys. Res., 112, G02009, 2007.

70 Sachs, T., Giebels, M., Boike, J., and Kutzbach, L.: Environmental controls on CH<sub>4</sub>  
 71 emission from polygonal tundra on the microsite scale in the Lena river delta,  
 72 Siberia, Glob. Change Biol., 16, 3096-3110, 10.1111/j.1365-2486.2010.02232.x,  
 73 2010.

74 Turetsky, M. R., Wieder, R. K., and Vitt, D. H.: Boreal peatland C fluxes under varying  
 75 permafrost regimes, Soil Biol. Biochem., 34, 907-912, 2002.

76 Vourlitis, G. L., Oechel, W. C., Hastings, S. J., and Jenkins, M. A.: A system for  
 77 measuring in situ CO<sub>2</sub> and CH<sub>4</sub> flux in unmanaged ecosystems: an arctic example,  
 78 Funct. Ecol., 369-379, 1993.

79 **Table S1** Site information of methane measurements used for the validation.

| Site Name                                                       | Latitude (°) | Longitude (°) | Reference                |
|-----------------------------------------------------------------|--------------|---------------|--------------------------|
| Toolik Lake, Alaska, USA                                        | 68.63        | -149.63       | Christensen (1993)       |
| Patuanak, Saskatchewan, Canada                                  | 55.85        | -107.68       | Turetsky et al. (2002)   |
| Yamal Peninsula, Russia                                         | 68.13        | 71.70         | Heyer et al. (2002)      |
| Chersky, Russia                                                 | 68.83        | 161.67        | Nakano et al. (2000)     |
| Lena Delta, Russia                                              | 72.37        | 126.50        | Sachs et al. (2010)      |
| Thompson, Manitoba, Canada                                      | 55.67        | -97.87        | Bellisario et al. (1999) |
| North Point - Kinosheo transect,<br>Hudson Bay lowlands, Canada | 51.47        | -80.62        | Moore et al. (1994)      |
| North Point - Kinosheo transect,<br>Hudson Bay lowlands, Canada | 51.55        | -81.77        | Moore et al. (1994)      |
| Lementa Bog, Fairbanks, Alaska,<br>USA                          | 64.88        | -147.50       | Moosavi et al. (1996)    |
| Prudhoe Bay, Alaska, USA                                        | 70.30        | -148.32       | Vourlitis et al. (1993)  |
| Barrow, Alaska, USA                                             | 71.00        | -157.00       | Rhew et al. (2007)       |
| Tobolsk, West Siberia, Russia                                   | 58.47        | 68.12         | Glagolev et al. (2011)   |
| Surgut, West Siberia, Russia                                    | 61.43        | 73.33         | Glagolev et al. (2011)   |
| Pangody, West Siberia, Russia                                   | 65.87        | 74.96         | Glagolev et al. (2011)   |
| Plotnikovo, West Siberia, Russia                                | 56.85        | 82.85         | Glagolev et al. (2011)   |
| Noyabrsk-Hills, West Siberia,<br>Russia                         | 63.12        | 74.49         | Glagolev et al. (2011)   |
| Noyabrsk-Palsa, West Siberia,<br>Russia                         | 63.80        | 75.55         | Glagolev et al. (2011)   |
| Vah, West Siberia, Russia                                       | 59.74        | 70.42         | Glagolev et al. (2011)   |
| Muhrino, West Siberia, Russia                                   | 60.89        | 68.70         | Glagolev et al. (2011)   |
| Tazovsky, West Siberia, Russia                                  | 67.18        | 78.92         | Glagolev et al. (2011)   |
| Gyda, West Siberia, Russia                                      | 70.89        | 78.55         | Glagolev et al. (2011)   |
| Skala, West Siberia, Russia                                     | 55.40        | 81.78         | Glagolev et al. (2011)   |

81 **Figure captions**

82 **Fig. S1.** The VIC grid cells over the pan-Arctic at a spatial resolution of 100 km.

83 **Fig. S2.** The delineation of the watersheds over the pan-Arctic (average surface area of  
84 6597 km<sup>2</sup>), derived from HYDRO1K dataset.

85 **Fig. S3.** An illustration of TOPMODEL-based parameterization scheme used for  
86 redistributing water table depth. See text for more details.

87 **Fig. S4.** Calibrated monthly parameter  $\alpha$  for TOPMODEL-based parameterization (a)  
88 and the comparison of monthly total inundated area from GIEMS data (Prigent et al.,  
89 2007; Papa et al., 2010) and model simulations (b) from 1993 to 2004.

90 **Fig. S5.** Monthly precipitation and air temperature averaged over the pan-Arctic for the  
91 year 1994 (maximum methane emission year from 1993 to 2004 at a 5-km spatial  
92 resolution). The climate data was derived from NCEP/NCAR Reanalysis dataset.
