# Supplementary figures and images for: Spatial scale-dependent land–atmospheric methane exchanges in the northern high latitudes from 1993 to 2004
Source: Copernicus journal article supplement (doi:10.5194/bg-11-1693-2014), 2014-04-01

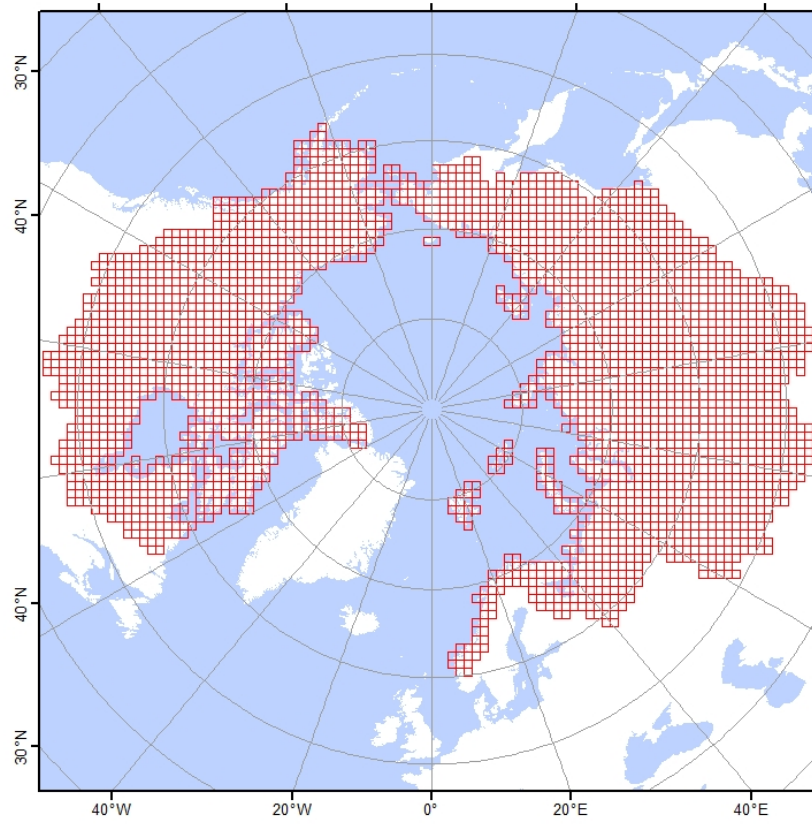

Supplement: Supplementary file 1 [file bg-11-1693-2014-supplement.zip]

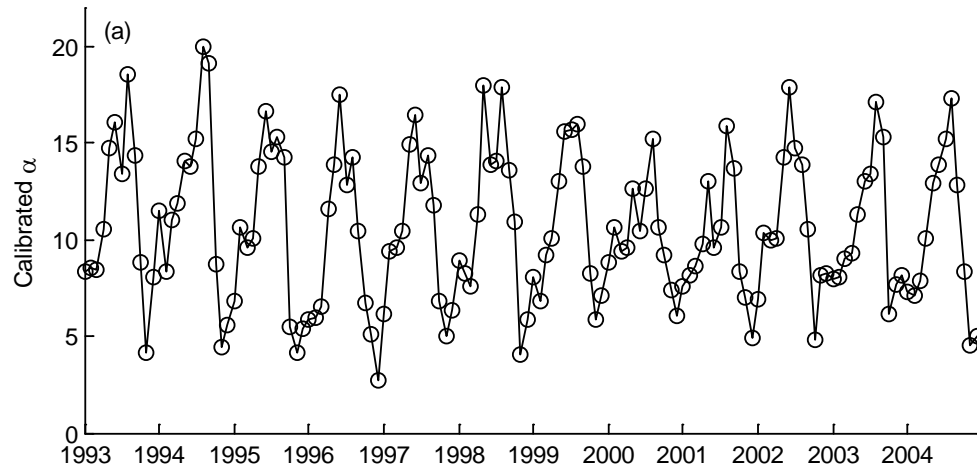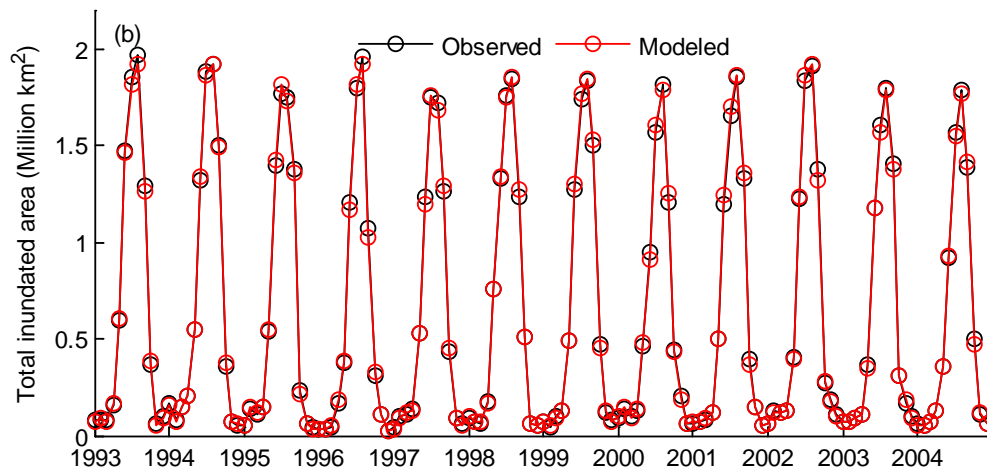

Supplement: Supplementary file 3 [file bg-11-1693-2014-supplement.zip]

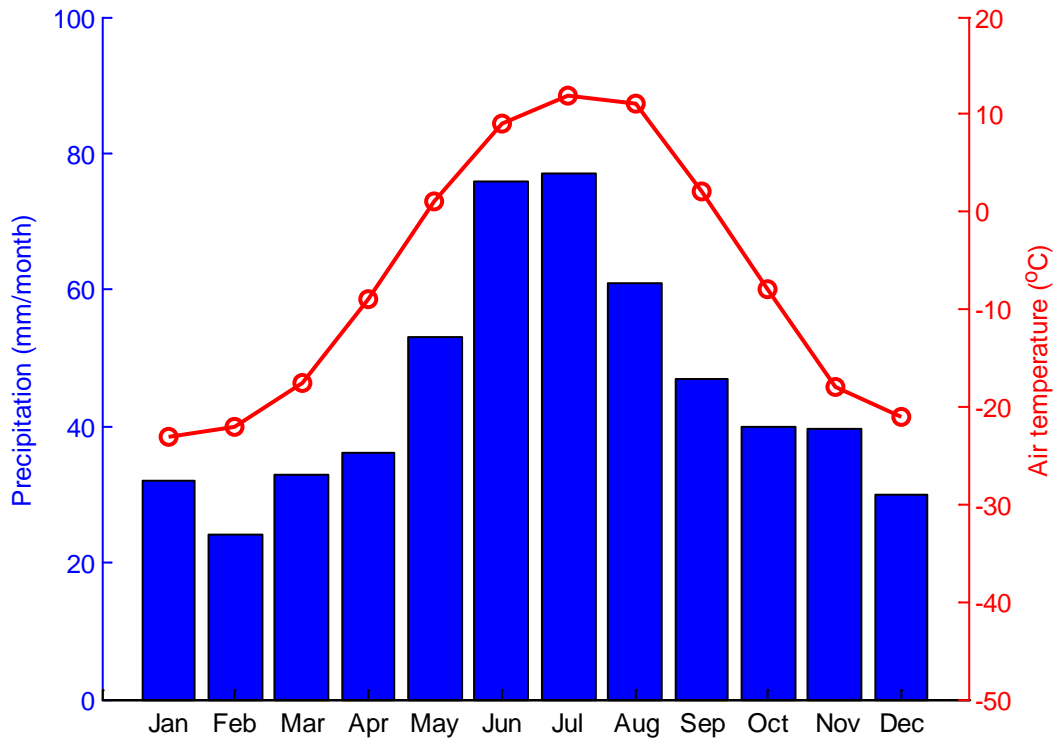

Supplement: Supplementary file 5 [file bg-11-1693-2014-supplement.zip]

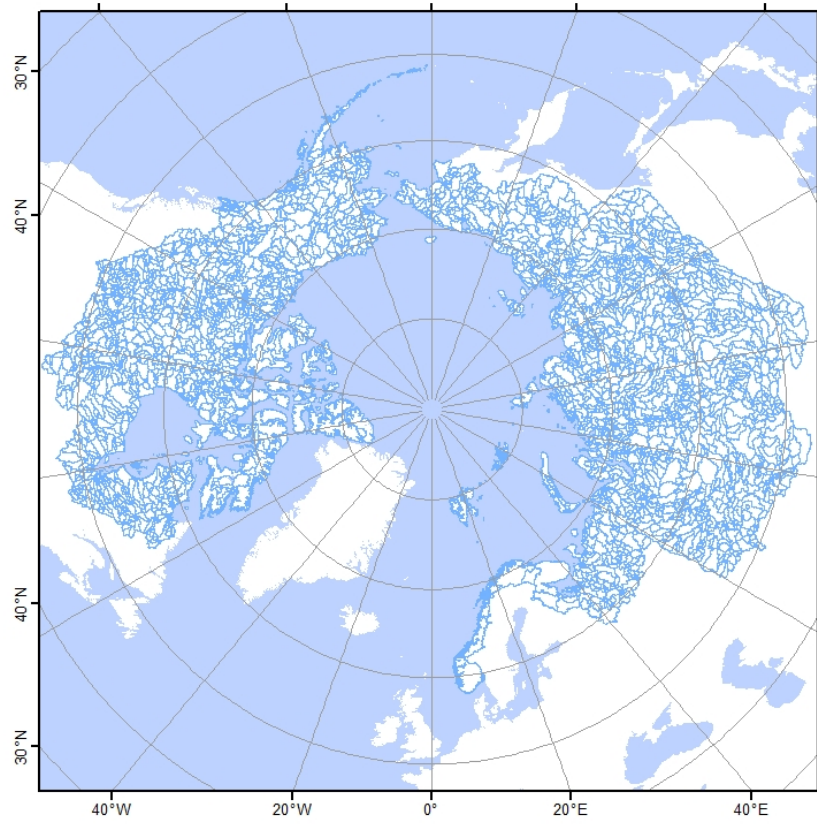

Supplement: Supplementary file 6 [file bg-11-1693-2014-supplement.zip]
